1     **Integration of RT-LAMP and Microfluidic Technology for Detection of SARS-CoV-2 in**  
2                     **Wastewater as an Advanced Point-of-care Platform**

3     Ahmed Donia <sup>1</sup>, Muhammad Furqan Shahid <sup>2</sup>, Aftab Ahmad <sup>1</sup>, Aneela Javed <sup>3</sup>, Muhammad  
4     Nawaz <sup>2</sup>, Tahir Yaqub <sup>2</sup>, Habib Bokhari <sup>1,4\*</sup>

5     <sup>1</sup> Department of Biosciences, Faculty of Science, COMSATS University Islamabad, Islamabad, Pakistan

6     <sup>2</sup> Institute of Microbiology, University of Veterinary and Animal Sciences, Lahore, Pakistan

7     <sup>3</sup> Healthcare Biotechnology, Atta-ur-Rahman School of Applied Biosciences, National University of  
8     Science and Technology, Islamabad, Pakistan

9     <sup>4</sup> Kohsar University Murree, Murree, Pakistan

10    Correspondence to Habib Bokhari: [vckohsaruniversity@gmail.com](mailto:vckohsaruniversity@gmail.com)

11    **Abstract**

12    Development of lab-on-a-chip (LOC) system based on integration of reverse transcription loop-  
13    mediated isothermal amplification (RT-LAMP) and microfluidic technology is expected to speed  
14    up SARS-CoV-2 diagnostics allowing early intervention. In the current work, reverse transcriptase  
15    quantitative polymerase chain reaction (RT-qPCR) and RT-LAMP assays were performed on  
16    extracted RNA of 7 wastewater samples. RT-LAMP assay was also performed on wastewater  
17    samples without RNA extraction. Current detection of SARS-CoV-2 is mainly by RT-qPCR of  
18    ORF (ORF1ab) and N genes so we targeted both to find the best surrogate marker for SARS-  
19    CoV-2 detection. We also performed RT-LAMP with/without RNA extraction inside microfluidic  
20    device to target both genes. Positivity rates of RT-qPCR and RT-LAMP performed on extracted  
21    RNA were 100.0% (7/7) and 85.7% (6/7), respectively. RT-qPCR results revealed that all 7  
22    wastewater samples were positive for N gene (Ct range 37-39), and negative for ORF1ab,

23 suggesting that N gene could be used as a surrogate marker for detection of SARS-CoV-2. RT-  
24 LAMP of N and ORF (ORF1a) genes performed on wastewater samples without RNA extraction  
25 indicated that all 7 samples remains pink (negative). The color remains pink in all microchannels  
26 except the one which subjected to RT-LAMP for targeting N region after RNA extraction  
27 (yellowish/orange color). This study shows for the first time that SARS-CoV-2 was successfully  
28 detected from wastewater samples using RT-LAMP in microfluidic chips.

29 **Keywords:** SARS-CoV-2; RT-LAMP; microfluidic device; N gene

## 30 **Introduction**

31 Severe acute respiratory syndrome coronavirus 2 (SARS-CoV-2) is a highly transmissible and  
32 pathogenic coronavirus and it is the causative agent of the coronavirus disease 2019 (COVID-19)  
33 pandemic [1]. Although there are massive coronavirus vaccination campaigns all over the world,  
34 strong public health surveillance and rapid diagnostic testing is considered as the best way to  
35 control COVID-19 [2-4]. The gold standard to diagnose COVID-19 is reverse transcriptase  
36 quantitative polymerase chain reaction (RT-qPCR) [5]. Droplet digital RT-PCR (RT-ddPCR)  
37 offers an attractive platform for quantification of SARS-CoV-2 RNA [6]. Factors such as high  
38 sensitivity and specificity, requirement of highly trained personnel, and the need of special  
39 facilities and high-cost instrumentation limit its application especially in developing countries [7].  
40 Reverse transcription loop-mediated isothermal amplification (RT-LAMP) is an isothermal  
41 nucleic acid amplification technique that is being widely used as point-of-care detection of SARS-  
42 CoV-2 in clinical samples [8]. RT-LAMP possesses some fundamental advantages such as  
43 sensitivity, speed, exclusion of a thermal cycler, and robustness to sample inhibitor making it a  
44 promising alternative to RT-qPCR [9]. LAMP takes less than one hour for amplifying the genetic

45 material of the pathogen, and requires a set of four to six primers, ensuring high specificity [10].  
46 Amplification product of LAMP can be confirmed using different procedures such as changes in  
47 fluorescence using intercalating dyes, DNA probes with gold nanoparticles [11, 12], changes in  
48 turbidity caused by magnesium pyrophosphate precipitate [13], pH indicators, or gel  
49 electrophoresis followed by UV detection [14]. The most frequently used method is based on color  
50 change of colorimetric master mix containing a visible pH indicator for rapid and easy detection  
51 [4, 14, 15].

52 Although inhalation of aerosol/droplet and person-to-person contact are the major transmission  
53 routes of SARS-CoV-2, current evidence points out that the viral RNA is detected in wastewater,  
54 urging the need to better understand wastewater as potential source of epidemiological data and  
55 human health risks, which can be applied as an early warning system [16-19]. SARS-CoV-2 may  
56 cause asymptomatic or pauci-symptomatic infections [20-22], which could add more limitations  
57 to determine the actual degree of SARS-CoV-2 circulation in a community. In the meantime,  
58 wastewater surveillance can give an unbiased method of estimating the spread of infection in  
59 different places, especially in developing countries, where resources for clinical diagnosis are  
60 sparse and limited [23]. Currently, detection of SARS-CoV-2 in wastewater primarily relies on  
61 RT-qPCR [24-26], which is laborious, costly, time-consuming, and requires extensive personnel  
62 skills [4, 15].

63 The field of microfluidics provides an alternative to the time-consuming bench assays [27]. Micro-  
64 electromechanical systems and microelectronics technologies have an important role in the  
65 emergence of microfluidic devices, which are able to manipulate minute amounts of fluids and  
66 extracting information from it, offering the potential to quickly acquire information from the small  
67 sample volumes [28]. It has increasingly been used for point of care testing or bedside. There are

68 many available microfluidic devices for early diagnosis of diseases or other health-related  
69 conditions such as pneumonia, glucose level, and pregnancy test by the detection of target elements  
70 [27, 29]. In recent years, viruses could be also detected using microfluidic devices [30, 31].  
71 Microfluidic devices promise cheaper, faster, sensitive and easy-to-use methods, so they have a  
72 high potential to be an alternative way for the viral RNA detection [32]. Microfluidic devices have  
73 previously been applied for detection of RNA viruses such as HIV [33], Hepatitis A virus [34],  
74 H1N1 [35], Zika [36], and norovirus [34], with acceptable results.

75 In the present study, we aim to evaluate the efficacy of RT-LAMP to detect SARS-CoV-2 in  
76 wastewater as a point of care method to provide early warning system for COVID-19 transmission  
77 in the community. Current detection of SARS-CoV-2 is mainly by RT-qPCR of ORF (ORF1ab)  
78 and N genes so we try to find the best surrogate gene marker for SARS-CoV-2 detection. We also  
79 aim, for the first time, to assess the application RT-LAMP in microfluidic device as an advanced  
80 point of care to detect SARS-CoV-2 in wastewater.

## 81 **Material and methods**

### 82 **Wastewater sampling**

83 Grab sampling technique was used to collect untreated wastewater samples (sewage samples).  
84 During the peak morning flow, 500 ml of wastewater was collected from the midstream into a leak  
85 proof, sterile container at a downstream sampling site. Seven wastewater samples were collected  
86 in early morning from hot COVID-19 spots in Islamabad, capital of Pakistan on 4 April 2021 and  
87 were kept at 4 °C. In the following day (5 April 2021) early morning, samples were transported at  
88 4 °C to the BSL-3 facility at the Institute of Microbiology (IM), University of Veterinary and  
89 Animal Sciences (UVAS) Lahore, Pakistan.

90 **Sample processing and RNA extraction**

91 RNA of each wastewater sample was extracted in BSL-3 of IM, UVAS Lahore, Pakistan. Before  
92 extraction, each sample was vortexed thoroughly and 1 ml of the sample was transferred to  
93 microfuge tube. Samples were centrifuged at 5000 rpm for 15 minutes at 4 °C. The supernatant  
94 was used for RNA extraction [37]. RNA was extracted using Viral Nucleic Acid Extraction Kit II  
95 Geneaid (Geneaid Biotech, Taiwan), according to the manufacturer's protocol. The RNA was  
96 stored at -80°C, and used as a template for both RT-qPCR, and RT-LAMP. We performed RNA  
97 extraction step on the seven samples directly without virus concentration step to check if virus  
98 concentration step is necessary or can be skipped in RT-LAMP of wastewater samples.

99 **RT-qPCR analysis**

100 RT-qPCR analysis of the seven wastewater samples was performed by using the commercially  
101 available kit (2019-nCoV Nucleic Acid Diagnostic Kit, Sansure Biotech Inc., China). This kit is  
102 used for detection of the ORF (ORF1ab) and N genes of SARS-CoV-2. According to Sansure  
103 protocol, we selected FAM (ORF-1ab region) and ROX (N gene) channels. Each reaction mixture  
104 contained 26µl of 2019-nCoV-PCR Mix, 4µl of 2019-nCoV-PCR Enzyme Mix, and 20 µl RNA  
105 extract so the final volume will be 50 µl. Thermal cycling reactions are shown in Table 1. RT-  
106 qPCR analysis was run on CFX96 real-time thermal cycler (Bio-Rad, USA). All RT-qPCR  
107 reactions also had positive and negative controls. Interpretation of results is shown in Table 2.

108 **Table 1: Thermal cycling reactions of RT-qPCR of SARS-CoV-2 according to Sansure**  
109 **protocol.**

|  | Steps | Temperature. | Time. | Cycle No. |
|--|-------|--------------|-------|-----------|
|--|-------|--------------|-------|-----------|

|   |                                                  |      |         |    |
|---|--------------------------------------------------|------|---------|----|
| 1 | Reverse transcription                            | 50°C | 30 min. | 1  |
| 2 | cDNA predenaturation                             | 95°C | 1 min.  | 1  |
| 3 | Denaturation                                     | 95°C | 15 sec. | 45 |
|   | Annealing, extension and fluorescence collection | 60°C | 30 sec. |    |
| 4 | Device cooling                                   | 25°C | 10 sec. | 1  |

110

111 **Table 2: Explanation of detection result according to Sansure protocol.**

| Conclusion          | Amplification results                                                                                                                                                                                 |
|---------------------|-------------------------------------------------------------------------------------------------------------------------------------------------------------------------------------------------------|
| SARS-CoV-2 Positive | There is typical S-shape amplification curve detected at FAM and/or ROX channel, and the amplification curve which is detected at CY5 (internal control) channel, $Ct \leq 40$ .                      |
| SARS-CoV-2 Negative | There is no typical S-shape amplification curve (No Ct) or $Ct > 40$ detected at FAM and ROX channel, and the amplification curve which is detected at CY5 channel (internal control), $Ct \leq 40$ . |

112

113

114 **RT-LAMP assays performed with/without RNA extraction**

115 RT-LAMP assays were performed on the seven wastewater samples according to Zhang *et al.* [38]  
116 with two sets of LAMP primers targeting ORF (ORF1a) and N genes [38] as shown in Table 3.  
117 We selected these two sets, because Zhang *et al.* [38] concluded that these two sets were the best  
118 performing among five tested sets targeted the ORF (ORF1a) and N genes [38]. The 5' frameshift  
119 nature of polyproteins (ORF1a/ORF1ab) [39] allows us to use primers for ORF1a, ORF1ab genes  
120 in RT-LAMP, RT-qPCR respectively. In other way, ORF1ab, the largest gene, contains  
121 overlapping open reading frames that encode polyproteins PP1a and PP1ab [40] so ORF1a is part  
122 of ORF1ab.

123 In brief, the assay was performed in a 20  $\mu$ L reaction mixture containing 2  $\mu$ L of 10x primer mix  
124 of 16  $\mu$ M (each) of Forward Inner Primer (FIP) and Backward Inner Primer (BIP), 2  $\mu$ M (each) of  
125 F3 and B3 primers, 4  $\mu$ M (each) of Forward Loop (LF) and Backward Loop (LB) primers, 10  $\mu$ L  
126 of WarmStart Colorimetric Lamp 2X Master Mix (M1800) (New England Biolabs, USA), 5  $\mu$ L of  
127 DNase, RNAase free water (Invitrogen, USA), and 3  $\mu$ L of RNA template. The reaction mixture  
128 was set at 65 °C for 30 minutes on a pre-heated dry bath. Yellow color indicates positive reaction,  
129 where pink indicates negative one. Orange color indicates positive samples with low viral loads  
130 having Ct >30 [41]. For confirmation of RT-LAMP, reactions were run on 2% agarose gel  
131 electrophoresis (100 V) for 45 min, stained with ethidium bromide and visualized using a UV  
132 transilluminator [41]. We also performed RT-LAMP on the 7 samples directly without RNA  
133 extraction to check if RNA extraction is necessary or can be omitted in RT-LAMP of wastewater  
134 samples.

135 **Table 3: Sequences of amplicons and LAMP primers [38]**

| LAMP primer | Sequence |
|-------------|----------|
|-------------|----------|

| <b>ORF1a</b> |                                            |
|--------------|--------------------------------------------|
| ORF1a - F3   | CTGCACCTCATGGTCATGTT                       |
| ORF1a -B3    | AGCTCGTCGCCTAAGTCAA                        |
| ORF1a -FIP   | GAGGGACAAGGACACCAAGTGTATGGTTGAGCTGGTAGCAGA |
| ORF1a -BIP   | CCAGTGGCTTACCGCAAGGTTTTAGATCGGGCGCCGTAAC   |
| ORF1a -LF    | CCGTACTGAATGCCTTCGAGT                      |
| ORF1a -LB    | TTCGTAAGAACGGTAATAAAGGAGC                  |
| <b>N</b>     |                                            |
| N-F3         | TGGCTACTACCGAAGAGCT                        |
| N-B3         | TGCAGCATTGTTAGCAGGAT                       |
| N-FIP        | TCTGGCCCAGTTCCTAGGTAGTCCAGACGAATTCGTGGTGG  |
| N-BIP        | AGACGGCATCATATGGGTTGCACGGGTGCCAATGTGATCT   |
| N-LF         | GGACTGAGATCTTTCATTTTACCGT                  |
| N-LB         | ACTGAGGGAGCCTTGAATACA                      |

136

### 137 **RT-LAMP assays in microfluidic device**

138 The microchips were designed using CAD software (SolidWorks, Dassault Systemes) and 8 mm  
139 long microchannels were micromachined on a polymethyl methacrylate (PMMA) piece (1.2 mm  
140 thickness) with a cross-section of 0.6 x 0.6 mm (width x depth). A sample container was also  
141 micromilled using 5 mm thick PMMA sheets to load 10  $\mu$ L sample into each well. Before use,  
142 microcapillaries were coated with polyvinyl alcohol (PVA) to convert their surfaces from  
143 hydrophobic to hydrophilic, allowing liquid to rise in the microchannels [42, 43] with  
144 modifications. In brief, 2% PVA (molecular weight 146000–186000) was prepared in deionized



145 water (DI) water and used to fill the microchannels at room temperature. After 30 minutes, excess  
146 PVA was removed and the microchannels were dried by injection of compressed air. Then, the  
147 microchip was simply dipped into the RT-LAMP reaction solution loaded via capillary action  
148 without need of pump.

149 We performed RT-LAMP inside microfluidic device to target ORF (ORF1a), and N genes of the  
150 first sample. We used both RNA extract and direct wastewater sample (without RNA extraction).  
151 In brief, the assay was performed in a 20  $\mu$ L reaction mixture containing 2  $\mu$ L of 10x primer mix  
152 of 16  $\mu$ M (each) of Forward Inner Primer (FIP) and Backward Inner Primer (BIP), 2  $\mu$ M (each) of  
153 F3 and B3 primers, 4  $\mu$ M (each) of Forward Loop (LF) and Backward Loop (LB) primers, 10  $\mu$ L  
154 of WarmStart Colorimetric Lamp 2X Master Mix (M1800) (New England Biolabs, USA), 5  $\mu$ L of  
155 DNase, RNAase free water (Invitrogen, USA), and 3  $\mu$ L of RNA template (in case of using RNA  
156 extracts) or 3  $\mu$ L of wastewater sample directly (in case of not using RNA extracts). Then, we placed  
157 this reaction mixture in the wells for successful loading into microchannels. Then, microfluidic  
158 device was carefully placed in a pre-heated dry bath at 65 °C for 30 minutes.

## 159 **Results**

### 160 **Analysis of RT-qPCR and RT-LAMP done on RNA extracts**

161 The results of 7 samples tested by RT-LAMP and RT-qPCR are shown in Table 4. Positivity rates  
162 of RT-qPCR and RT-LAMP were 100.0% (7/7) and 85.7% (6/7), respectively. RT-qPCR results  
163 revealed that all 7 wastewater samples were positive for N gene (Ct range 37-39), and negative for  
164 ORF (ORF1ab). All samples had Ct for internal control (CY5 channel) less than 40. Therefore,  
165 according to the guidelines of RT-qPCR kit manufacturer company (Sansure), all 7 samples were  
166 positive for SARS-CoV-2. This was also the case for RT-LAMP except for sample ID 3, where it

167 was negative for both N and ORF (ORF1a) as confirmed by visualization in 2% agarose gel stained  
168 with ethidium bromide.

169 Of 7 wastewater samples positive for SARS-CoV-2 by RT-qPCR, 6 were positive by RT-LAMP  
170 (sensitivity of 85.7%). As shown in Figure 2, results of RT-LAMP targeted N gene of SARS-CoV-  
171 2 revealed that 5 samples (sample id 1, 4, 5, 6, and 7) showed color change to orange color. Sample  
172 ID 2, and 3 did not show conclusive change in color. Visualization in 2% agarose gel stained with  
173 ethidium bromide revealed that 6 samples (sample id 1, 2, 4, 5, 6, and 7) have characteristic LAMP  
174 amplicon profiles. It is worthy to mention that sample id 5 has the strongest intensity when it  
175 visualized in 2% agarose gel, which also has the lowest N gene Ct value of 35 among all other  
176 samples. As shown in Figure 3, results of RT-LAMP targeted ORF (ORF1a gene) of SARS-CoV-2  
177 revealed are not confirmatory by naked eye. We cannot confirm that these are negative (pink) or  
178 positive (yellow/orange) by just naked eye. Visualization in 2% agarose gel stained with ethidium  
179 bromide showed that RT-LAMP targeted ORF (ORF1a gene) of these 7 samples are negative with  
180 no LAMP amplicon profiles (Figure 1).

### 181 **RT-LAMP without RNA extraction**

182 We performed RT-LAMP for amplification of N and ORF (ORF1a) genes directly on wastewater  
183 samples without RNA extraction, and found that all seven samples remains pink indicating  
184 negative results with naked eyes (Figure 4). Visualization in 2% agarose gel stained with ethidium  
185 bromide showed that all 7 samples are negative with no LAMP amplicon profiles.

### 186 **RT-LAMP assays in microfluidic device**

187 As shown in Figure 5, the color remains pink in all microchannels except the one which subjected  
188 to RT-LAMP for targeting N region after RNA extraction (yellowish/orange color). Although there

189 may be slight change in color of microchannel that subjected to RT-LAMP for targeting ORF1a  
190 gene after RNA extraction, visualization in 2% agarose gel stained with ethidium bromide showed  
191 that it is negative with no LAMP amplicon profiles.

192 **Table 4: Comparison of detection accuracy between RT-LAMP and RT-qPCR**

| Sample ID | RT-qPCR      |    | RT-LAMP     |   |
|-----------|--------------|----|-------------|---|
|           | ORF (ORF1ab) | N  | ORF (ORF1a) | N |
| 1         | 41           | 39 | -           | + |
| 2         | N/A          | 38 | -           | + |
| 3         | 42           | 37 | -           | - |
| 4         | N/A          | 39 | -           | + |
| 5         | 41           | 35 | -           | + |
| 6         | N/A          | 38 | -           | + |
| 7         | 44           | 37 | -           | + |

193 + Positive reaction; - Negative reaction; N/A not detected

194

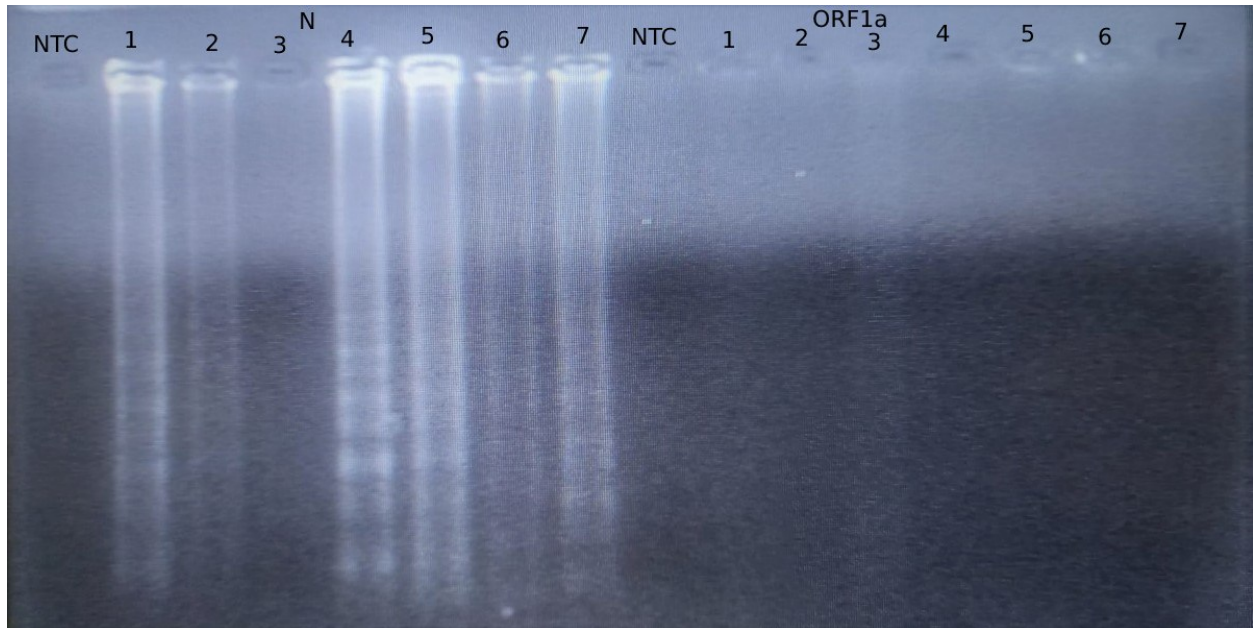

195 Figure 1: The seven samples were tested for the presence of N gene on the left of the gel, and  
196 they were tested again for the presence of ORF1a region on the right of the gel. Amplification  
197 visualized in a 2% agarose gel stained with ethidium bromide, showing characteristic LAMP  
198 amplicon profiles in positive samples and no amplification in non-template controls (NTC).

199

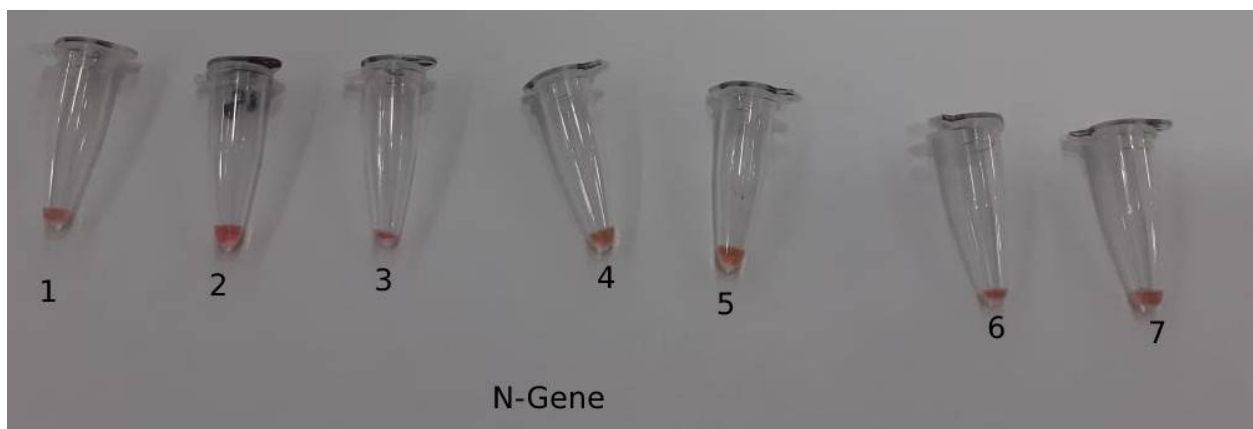

200 Figure 2: The colorimetric detection of SARS-CoV-2 (N gene) using RT-LAMP of the seven  
201 wastewater samples after RNA extraction.

202

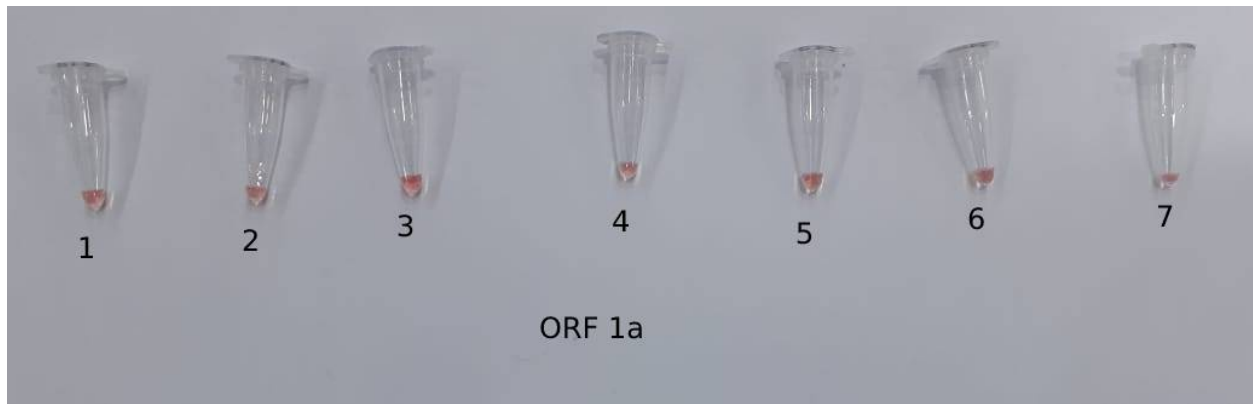

203 Figure 3: The colorimetric detection of SARS-CoV-2 (ORF1a gene) using RT-LAMP of the  
204 seven wastewater samples after RNA extraction.

205

206

207

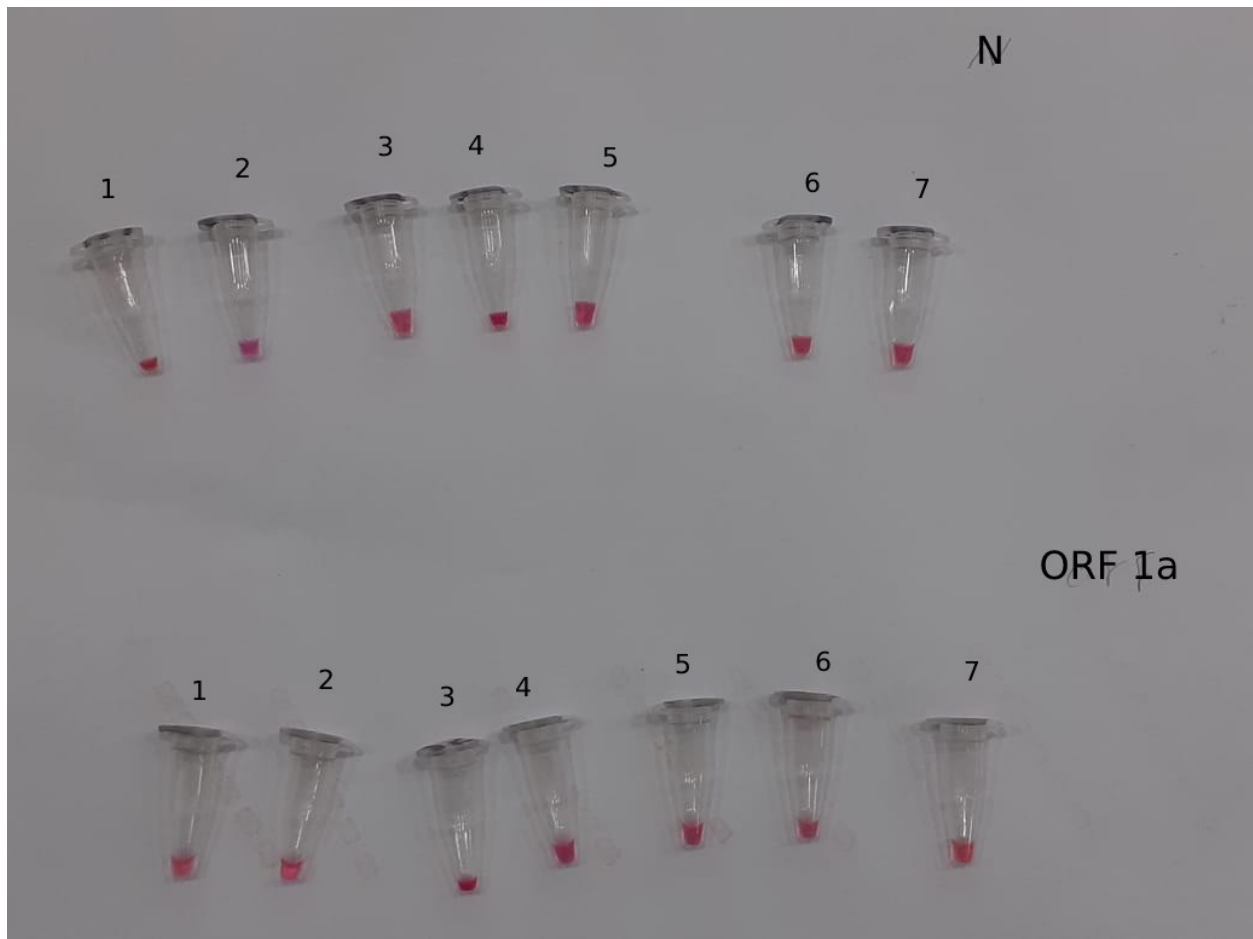

208

209 Figure 4: The colorimetric detection of SARS-CoV-2 (N and ORF1a genes) using RT-LAMP of  
210 the seven wastewater samples directly without RNA extraction (All seven samples remains pink  
211 indicating negative results).

212

213

214

215

216

217

218

219

220

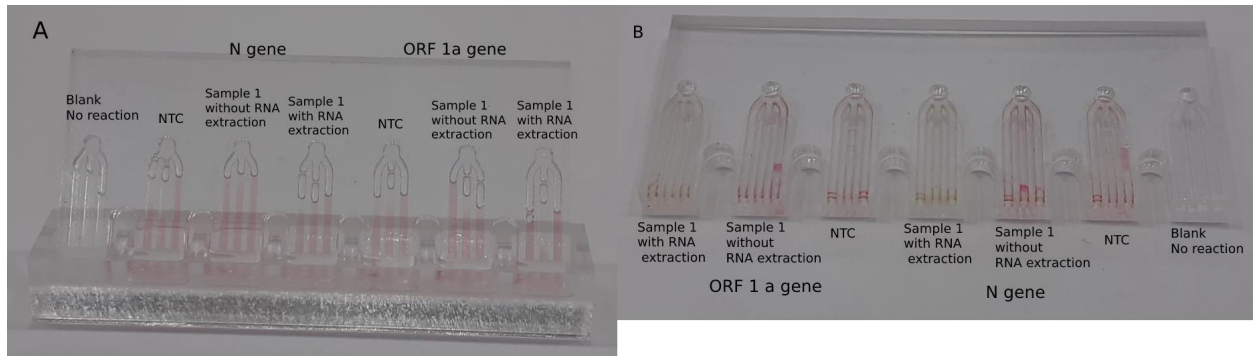

221 Figure 5: (A) successful loading of RT-LAMP reaction mixture to target N, and ORF1a genes of  
222 one sample into microfluidic chip. (B) RT-LAMP reaction results showing change of color into  
223 yellowish/orange in samples after RNA extraction in sample 1 targeting N gene.

## 224 Discussion

225 RT-LAMP recently emerges as an alternative point-of-care test for detection of SARS-CoV-2,  
226 including clinical sample testing, with reaction time varying between 20 and 40 minutes [38, 41,  
227 44]. RT-LAMP has some fundamental advantages such as constant temperature amplification,  
228 elimination of a thermal cycler, quick test result, constant temperature amplification, and wide  
229 diagnostic capacity, while keeping similar specificity and sensitivity, thus making it more  
230 appropriate than the RT-qPCR for monitoring a pandemic such as COVID-19 [45]. To detect  
231 SARS-CoV-2 RNA with RT-LAMP, we used the WarmStart Colorimetric LAMP 2X Master Mix  
232 (DNA and RNA) from New England Biolabs (USA), which contains two enzymes, an engineered  
233 reverse transcriptase (RTx) and a warmStart strand-displacing DNA polymerase (Bst 2.0) in a

234 special low-buffer reaction solution containing a visible pH indicator for easy and rapid detection  
235 of LAMP (DNA) and RT-LAMP (RNA) reactions. As a way to avoid nonspecific priming  
236 reactions, there are oligonucleotide-based aptamers in the reaction mixture to work as reversible  
237 temperature-dependent inhibitors, ensuring that the reaction only starts at high temperature  
238 (WarmStart) ([https://international.neb.com/products/m1800-warmstart-colorimetric-lamp-2x-](https://international.neb.com/products/m1800-warmstart-colorimetric-lamp-2x-master-mix-dna-rna)  
239 [master-mix-dna-rna](https://international.neb.com/products/m1800-warmstart-colorimetric-lamp-2x-master-mix-dna-rna)). This aim of this system is to provide a fast, clear visual detection of  
240 amplification based on the production of protons, leading to pH drop due to extensive DNA  
241 polymerase activity in a LAMP reaction, producing a color change from pink (alkaline) to yellow  
242 (red).

243 Wastewater-based epidemiology is an alternative method to predict virus spread and it considered  
244 as an early warning pandemic through detecting pathogens in wastewater [16, 46]. SARS-CoV-2  
245 biomarkers can be detected in the wastewater and/or sewer system, because the SARS-CoV-2 can  
246 be isolated from the infected patients' urine and feces [47]. Therefore, wastewater analysis in  
247 communities is a potential method to track infected people, and to monitor the epidemiology of  
248 the communities [48]. Most of published papers are about using of RT-LAMP for detection of  
249 SARS-CoV-2 in patient or clinical samples [14, 41, 49-53], with few of them have focused on  
250 detection of SARS-CoV-2 using RT-LAMP in wastewater or sewage samples [54, 55]. We found  
251 that results of RT-LAMP for these wastewater samples were largely consistent with those of RT-  
252 qPCR, with 6 out of 7 (85.7%) samples were positive for both RT-LAMP and RT-qPCR. Only one  
253 sample (sample id 3) tested positive by RT-qPCR was negative by our RT-LAMP. The observed  
254 difference in positive predictive value of RT-LAMP and RT-qPCR may be due to more /less RNA  
255 input [56]. We also noticed that the final volume of RT-LAMP product of this sample (sample id  
256 3) was very low, which may reflect on the result of RT-LAMP. This raises concerns about the



257 effect of final volume of RT-LAMP product and interpretation of result. Our RT-LAMP positive  
258 samples ( $Ct > 35$ ) showed color change to orange color, which is in agreement with previously  
259 mentioned [41] that orange color indicates positive samples with low viral loads having  $Ct > 30$ .

260 The Nucleocapsid protein can regulate the replication, transcription and packaging, and it is  
261 important for viral viability. There is a growing interest in studying the N protein for vaccine  
262 development because of its highly immunogenic and its highly conserved amino acid sequence  
263 [57]. Currently, the detection of SARS-CoV-2 RNA is mainly performed by RT-qPCR detection  
264 of two target genes, including ORF1ab and N [56]. We found that the Ct values of N gene for all  
265 of our 7 wastewater samples were lower than the Ct values of ORF1ab gene, suggesting that N  
266 gene is the most important gene when monitoring SARS-CoV-2. Our results were similar to what  
267 previously reported [58], where the highest proportion of positive results among COVID-19 was  
268 the N gene, followed by both ORF1ab and N. They found that the main positive fragment is the N  
269 gene, and the proportion of those positive for single ORF1ab was very low [58]. Therefore, we  
270 recommended monitoring of the N gene as surrogate marker for detection in clinical and  
271 wastewater samples, reducing the time and cost of nucleic acid detection. Amplified products of  
272 RT-LAMP targeting N gene of 6 samples visualized in agarose gel showed characteristic LAMP  
273 profile, whereas there was negative for ORF1a gene. This again confirms that N gene is the most  
274 important gene when monitoring SARS-CoV-2, especially with samples with weakly positive  
275 results ( $Ct > 30$ ). Loying and colleagues [59] studied the dynamics of ORF1ab and N genes among  
276 hospitalized COVID-19 positive patients, and they found that the persistent of positivity of N gene  
277 is significantly for more duration than ORF1ab, indicating that N gene requires longer duration of  
278 days to become negative than ORF1ab. This also underscores our proposition that N gene should  
279 be considered as a surrogate marker for detection in clinical and wastewater samples.

280 One of the most important advantage of RT-LAMP is its ability to detect SARS-CoV-2 directly  
281 from clinical samples without the need of RNA extraction [49, 60]. Wei and colleagues [60]  
282 developed and tested a highly sensitive and robust method based on RT-LAMP that uses readily  
283 available reagents and a simple heat block using contrived spike-in and actual clinical samples.  
284 They directly tested clinical nasopharyngeal swab samples in viral transport media without  
285 previous time-consuming and laborious RNA extraction with results in just 30 min. Mautner and  
286 colleagues [49] developed RT-LAMP assay to directly detect SARS-CoV-2 from pharyngeal swab  
287 samples without previous RNA extraction. They found that this method is 10 times cheaper and  
288 12 times faster than RT-qPCR, depending on the assay used. Previous study performed RT-LAMP  
289 on wastewater samples after RNA extraction and virus concentration [54]. According to CDC  
290 guidelines for wastewater surveillance testing methods  
291 (<https://www.cdc.gov/healthywater/surveillance/wastewater-surveillance/testing-methods.html>),  
292 small volumes of wastewater (e.g., 1 ml) may be tested without additional concentration processes  
293 if levels of SARS-CoV-2 RNA are sufficiently high in wastewater. Therefore, we targeted hotspots  
294 in Islamabad with recorded high COVID-19 cases, and took 7 wastewater samples to see the  
295 possibility to detect SARS-CoV-2 in wastewater without RNA extraction and virus concentration  
296 using direct RT-LAMP alone. Although RNA extraction may be omitted in RT-LAMP performed  
297 on clinical samples [49, 60], we found that RNA extraction is necessary in RT-LAMP performed  
298 on wastewater samples. However, Ongerth and Danielson detected SARS-CoV-2 in raw sewage  
299 samples with no preliminary sample processing for virus concentration and RNA extraction [61].  
300 Microfluidic techniques are emerging as disposable and cost-efficient tools for rapid diagnosis of  
301 viral infection [31]. Since microfluidic devices are sensitive, cheaper, faster, and easy-to-use  
302 methods, they have a high potential to be an alternative way for the viral RNA detection [32].

303 Safavieh *et al.* developed RT-LAMP cellulose-based paper microchips and amplified the target  
304 RNA using the RT-LAMP technique and detected the HIV-1 virus via the electrical sensing of  
305 LAMP amplicons [33]. Fraisse *et al.* designed RT-PCR integrated microfluidic device to detect  
306 Hepatitis A and noroviruses in the gut [34]. Song *et al.* developed RT-LAMP integrated  
307 microfluidic for detection of Zika virus [36]. Recently, Kim *et al.* designed RT-PCR integrated  
308 microfluidic device for detecting of H1N1 influenza in saliva [35].

309 For the first time, we used RT-LAMP in microfluidic chip for detection of SARS-CoV-2 in  
310 wastewater. After coating of microfluidic chip with PVA, RT-LAMP mixture can be successfully  
311 uploaded into microchannels. Then, we observed color change in microfluidic chip after placing  
312 it in pre-heated dry bath at 65 °C for 30 minutes. Although we found that detection of SARS-  
313 CoV-2 in wastewater using RT-LAMP in microfluidic chip requires RNA extraction, we propose  
314 that our workflow (without RNA extraction) could work with clinical samples since there are many  
315 reports about successful detection of SARS-CoV-2 in clinical samples using RT-LAMP without  
316 RNA extraction [49, 60, 62, 63]. If RNA extraction could be achieved in this microfluidic chip,  
317 this could greatly improve the results of this chip. Mauk and colleagues developed simple plastic  
318 microfluidic chip for nucleic acid-based testing of blood, other clinical specimens, water, food,  
319 and environmental samples [64]. They combines isolation of nucleic acid by solid-phase  
320 extraction; isothermal enzymatic amplification such as LAMP, nucleic acid sequence based  
321 amplification, and recombinase polymerase amplification; and real-time optical detection of DNA  
322 or RNA analytes. Although we could not detect clear color change in sample not subjected to RNA  
323 extraction, we propose that performing RNA extraction inside microchannels could greatly  
324 improve results.

325 Our work is expected to pave the road for designing readymade microfluidic chip with specific  
326 chamber for RNA extraction then another amplification chamber for RT-LAMP. This  
327 amplification product could be also labeled with a fluorophore reporter that could be excited with  
328 a LED light source and monitored in situ in real time with a photodiode or a CCD detector (such  
329 as available in a smartphone).

### 330 **Conclusion**

331 RT-LAMP has been emerging as a great alternative to the RT-qPCR because RT-LAMP is a  
332 specific, sensitive, fast, cheap, and easy-to-use method. We successfully detected SARS-CoV-2  
333 through color change (orange color) in our positive wastewater samples having Ct >30. We also  
334 found that the Ct values of N gene for all of our wastewater samples were lower than the Ct values  
335 of ORF1ab gene, suggesting that N gene could be used as a surrogate marker for monitoring and  
336 surveillance of environmental circulating SARS-CoV-2. This is also confirmed with RT-LAMP,  
337 where we detected characteristic RT-LAMP amplicon profile only for N gene. To our knowledge,  
338 we, for the first time, successfully detected SARS-CoV-2 from wastewater samples using RT-  
339 LAMP in microfluidic chips. This will provide an opportunity for developing more robust and  
340 economical approach for using this microchip device along with RT-LAMP as an advanced point  
341 of care for detection of SARS-CoV-2 in different samples.

### 342 **Funding**

343 This work was supported by The World Academy of Science (TWAS) and Microbiology and  
344 Public Health Laboratory, COMSATS University Islamabad (CUI) Pakistan, and Kohsar  
345 University Murree. Sponsors have no role in the study design, collection, analysis, interpretation  
346 of data, writing of the manuscript and in the decision to submit the manuscript for publication.

347 **Conflict of interest**

348 The authors report no conflicts of interest in this work.

349 **Availability of data and material (data transparency)**

350 Data available within the article or its supplementary materials

351 **Code availability (software application or custom code)**

352 Not applicable

353 **Acknowledgments**

354 This paper is part of PhD research work of the first author (Ahmed Donia) who is extremely  
355 thankful to Professor Habib Bokhari for supervision of this work. He would like to warmly thank  
356 all staff at The Biosafety Level-3 Laboratory for Emerging Pathogens, Institute of Microbiology,  
357 University of Veterinary and Animal Sciences (UVAS), Lahore, Pakistan for extreme support to  
358 carry out this work. We are thankful to Dr. Sammer-ul Hassan, University of Hong Kong for  
359 providing microfluidic devices (chips) to us.

360 **Author contributions**

361 AD and HB conceived and designed the study; AD coordinated, carried out the experiments,  
362 drafted the original manuscript, and analyzed the data. AD, MFS, AA, AJ, MN, TY, and HB did  
363 necessary editing of the manuscript. All authors read and approved the manuscript.

364 **References**

- 365 1. Hu, B., et al., *Characteristics of SARS-CoV-2 and COVID-19*. Nature Reviews Microbiology, 2020:  
366 p. 1-14 %@ 1740-1534.  
367 2. Fehr, A.R. and S. Perlman, *Coronaviruses: an overview of their replication and pathogenesis*.  
368 Coronaviruses, 2015: p. 1-23.

- 369 3. Montesinos, I., et al., *Evaluation of two automated and three rapid lateral flow immunoassays*  
370 *for the detection of anti-SARS-CoV-2 antibodies*. Journal of Clinical Virology, 2020. **128**: p.  
371 104413 %@ 1386-6532.
- 372 4. Aoki, M.N., et al., *Colorimetric RT-LAMP SARS-CoV-2 diagnostic sensitivity relies on color*  
373 *interpretation and viral load*. Scientific reports, 2021. **11**(1): p. 1-10 %@ 2045-2322.
- 374 5. Chan, J.F.-W., et al., *Improved molecular diagnosis of COVID-19 by the novel, highly sensitive and*  
375 *specific COVID-19-RdRp/Hex real-time reverse transcription-PCR assay validated in vitro and with*  
376 *clinical specimens*. Journal of clinical microbiology, 2020. **58**(5): p. e00310-20.
- 377 6. Kinloch, N.N., et al., *SARS-CoV-2 RNA quantification using droplet digital RT-PCR*. The Journal of  
378 Molecular Diagnostics, 2021.
- 379 7. Park, G.-S., et al., *Development of reverse transcription loop-mediated isothermal amplification*  
380 *assays targeting severe acute respiratory syndrome coronavirus 2 (SARS-CoV-2)*. The Journal of  
381 Molecular Diagnostics, 2020. **22**(6): p. 729-735 %@ 1525-1578.
- 382 8. Mautner, L., et al., *Rapid point-of-care detection of SARS-CoV-2 using reverse transcription loop-*  
383 *mediated isothermal amplification (RT-LAMP)*. Virology journal, 2020. **17**(1): p. 1-14 %@ 1743-  
384 422X.
- 385 9. Natoli, M., et al., *Reverse transcription loop-mediated isothermal amplification (RT-LAMP) for*  
386 *point-of-care detection of SARS-CoV-2: a clinical study to evaluate agreement with RT-qPCR*. The  
387 Lancet Global Health, 2021. **9**: p. S3.
- 388 10. Nguyen, T., D. Duong Bang, and A. Wolff, *2019 novel coronavirus disease (COVID-19): paving the*  
389 *road for rapid detection and point-of-care diagnostics*. Micromachines, 2020. **11**(3): p. 306.
- 390 11. Njiru, Z.K., et al., *Loop-mediated isothermal amplification (LAMP) method for rapid detection of*  
391 *Trypanosoma brucei rhodesiense*. PLoS neglected tropical diseases, 2008. **2**(2): p. e147.
- 392 12. Arunrut, N., et al., *Sensitive visual detection of AHPND bacteria using loop-mediated isothermal*  
393 *amplification combined with DNA-functionalized gold nanoparticles as probes*. PLoS One, 2016.  
394 **11**(3): p. e0151769.
- 395 13. Mori, Y., et al., *Real-time turbidimetry of LAMP reaction for quantifying template DNA*. Journal of  
396 biochemical and biophysical methods, 2004. **59**(2): p. 145-157 %@ 0165-022X.
- 397 14. Thi, V.L.D., et al., *A colorimetric RT-LAMP assay and LAMP-sequencing for detecting SARS-CoV-2*  
398 *RNA in clinical samples*. Science translational medicine, 2020. **12**(556).
- 399 15. García-Bernalt Diego, J., et al., *A Simple, Affordable, Rapid, Stabilized, Colorimetric, Versatile RT-*  
400 *LAMP assay to detect SARS-CoV-2*. Diagnostics, 2021. **11**(3): p. 438.
- 401 16. Donia, A., et al., *COVID-19 Crisis Creates Opportunity towards Global Monitoring & Surveillance*.  
402 Pathogens, 2021. **10**(3): p. 256.
- 403 17. Kitajima, M., et al., *SARS-CoV-2 in wastewater: State of the knowledge and research needs*.  
404 Science of The Total Environment, 2020. **739**: p. 139076.
- 405 18. Peccia, J., et al., *Measurement of SARS-CoV-2 RNA in wastewater tracks community infection*  
406 *dynamics*. Nature biotechnology, 2020. **38**(10): p. 1164-1167.
- 407 19. Wu, F., et al., *SARS-CoV-2 titers in wastewater are higher than expected from clinically confirmed*  
408 *cases*. Msystems, 2020. **5**(4): p. e00614-20.
- 409 20. Lai, C.-C., et al., *Asymptomatic carrier state, acute respiratory disease, and pneumonia due to*  
410 *severe acute respiratory syndrome coronavirus 2 (SARS-CoV-2): Facts and myths*. Journal of  
411 Microbiology, Immunology and Infection, 2020. **53**(3): p. 404-412 %@ 1684-1182.
- 412 21. Mizumoto, K., et al., *Estimating the asymptomatic proportion of coronavirus disease 2019*  
413 *(COVID-19) cases on board the Diamond Princess cruise ship, Yokohama, Japan, 2020*.  
414 Eurosurveillance, 2020. **25**(10): p. 2000180 %@ 1560-7917.
- 415 22. Nishiura, H., et al., *Estimation of the asymptomatic ratio of novel coronavirus infections (COVID-*  
416 *19)*. International journal of infectious diseases, 2020. **94**: p. 154.

- 417 23. Ahmed, W., et al., *First confirmed detection of SARS-CoV-2 in untreated wastewater in Australia: a proof of concept for the wastewater surveillance of COVID-19 in the community*. Science of The Total Environment, 2020. **728**: p. 138764 %@ 0048-9697.
- 418
- 419
- 420 24. Corman, V.M., et al., *Detection of 2019 novel coronavirus (2019-nCoV) by real-time RT-PCR*. Eurosurveillance, 2020. **25**(3): p. 2000045.
- 421
- 422 25. Sherchan, S.P., et al., *First detection of SARS-CoV-2 RNA in wastewater in North America: a study in Louisiana, USA*. Science of The Total Environment, 2020. **743**: p. 140621.
- 423
- 424 26. Ahmed, W., et al., *First confirmed detection of SARS-CoV-2 in untreated wastewater in Australia: a proof of concept for the wastewater surveillance of COVID-19 in the community*. Science of The Total Environment, 2020. **728**: p. 138764.
- 425
- 426
- 427 27. Berkenbrock, J.A., R. Grecco-Machado, and S. Achenbach, *Microfluidic devices for the detection of viruses: aspects of emergency fabrication during the COVID-19 pandemic and other outbreaks*. Proceedings of the Royal Society A, 2020. **476**(2243): p. 20200398.
- 428
- 429
- 430 28. Prakash, S., M. Pinti, and B. Bhushan, *Theory, fabrication and applications of microfluidic and nanofluidic biosensors*. Philosophical Transactions of the Royal Society A: Mathematical, Physical and Engineering Sciences, 2012. **370**(1967): p. 2269-2303.
- 431
- 432
- 433 29. Hassan, S.-u., et al., *Capillary-driven flow microfluidics combined with smartphone detection: an emerging tool for point-of-care diagnostics*. Diagnostics, 2020. **10**(8): p. 509.
- 434
- 435 30. Yang, L. and T. Yamamoto, *Quantification of virus particles using nanopore-based resistive-pulse sensing techniques*. Frontiers in microbiology, 2016. **7**: p. 1500.
- 436
- 437 31. Zhu, H., et al., *Recent advances in lab-on-a-chip technologies for viral diagnosis*. Biosensors and Bioelectronics, 2020. **153**: p. 112041.
- 438
- 439 32. Basiri, A., et al., *Microfluidic devices for detection of RNA viruses*. Reviews in Medical Virology, 2021. **31**(1): p. 1-11.
- 440
- 441 33. Safavieh, M., et al., *Paper microchip with a graphene-modified silver nano-composite electrode for electrical sensing of microbial pathogens*. Nanoscale, 2017. **9**(5): p. 1852-1861.
- 442
- 443 34. Fraise, A., et al., *Digital RT-PCR method for hepatitis A virus and norovirus quantification in soft berries*. International journal of food microbiology, 2017. **243**: p. 36-45.
- 444
- 445 35. Kim, Y., et al., *Integrated microfluidic preconcentration and nucleic amplification system for detection of influenza A virus H1N1 in saliva*. Micromachines, 2020. **11**(2): p. 203.
- 446
- 447 36. Song, J., et al., *Instrument-free point-of-care molecular detection of Zika virus*. Analytical chemistry, 2016. **88**(14): p. 7289-7294.
- 448
- 449 37. Yaqub, T., et al., *A longitudinal survey for genome-based identification of SARS-CoV-2 in sewage water in selected lockdown areas of Lahore city, Pakistan; a potential approach for future smart lockdown strategy*. MedRxiv, 2020.
- 450
- 451
- 452 38. Zhang, Y., et al., *Rapid molecular detection of SARS-CoV-2 (COVID-19) virus RNA using colorimetric LAMP*. MedRxiv, 2020.
- 453
- 454 39. Michel, C.J., et al., *Characterization of accessory genes in coronavirus genomes*. Virology Journal, 2020. **17**(1): p. 1-13.
- 455
- 456 40. Mousavizadeh, L. and S. Ghasemi, *Genotype and phenotype of COVID-19: Their roles in pathogenesis*. Journal of Microbiology, Immunology and Infection, 2020.
- 457
- 458 41. Aoki, M.N., et al., *Colorimetric RT-LAMP SARS-CoV-2 diagnostic sensitivity relies on color interpretation and viral load*. Scientific reports, 2021. **11**(1): p. 1-10.
- 459
- 460 42. Hassan, S.-u. and X. Zhang, *Design and fabrication of capillary-driven flow device for point-of-care diagnostics*. Biosensors, 2020. **10**(4): p. 39.
- 461
- 462 43. Reis, N.M., et al., *Lab on a stick: multi-analyte cellular assays in a microfluidic dipstick*. Lab on a Chip, 2016. **16**(15): p. 2891-2899.
- 463

- 464 44. Yu, L., et al., *Rapid detection of COVID-19 coronavirus using a reverse transcriptional loop-*  
465 *mediated isothermal amplification (RT-LAMP) diagnostic platform*. *Clinical chemistry*, 2020.  
466 **66**(7): p. 975-977.
- 467 45. Thompson, D. and Y. Lei, *Mini review: Recent progress in RT-LAMP enabled COVID-19 detection*.  
468 *Sensors and Actuators Reports*, 2020: p. 100017.
- 469 46. Mao, K., H. Zhang, and Z. Yang, *Can a paper-based device trace COVID-19 sources with*  
470 *wastewater-based epidemiology?* 2020, ACS Publications.
- 471 47. Holshue, M.L., et al., *First case of 2019 novel coronavirus in the United States*. *New England*  
472 *Journal of Medicine*, 2020.
- 473 48. Hui, Q., Y. Pan, and Z. Yang, *based devices for rapid diagnostics and testing sewage for early*  
474 *warning of COVID-19 outbreak*. *Case Studies in Chemical and Environmental Engineering*, 2020.  
475 **2**: p. 100064.
- 476 49. Mautner, L., et al., *Rapid point-of-care detection of SARS-CoV-2 using reverse transcription loop-*  
477 *mediated isothermal amplification (RT-LAMP)*. *Virology journal*, 2020. **17**(1): p. 1-14.
- 478 50. Huang, W.E., et al., *RT-LAMP for rapid diagnosis of coronavirus SARS-CoV-2*. *Microbial*  
479 *biotechnology*, 2020. **13**(4): p. 950-961.
- 480 51. Österdahl, M.F., et al., *Detecting SARS-CoV-2 at point of care: preliminary data comparing loop-*  
481 *mediated isothermal amplification (LAMP) to polymerase chain reaction (PCR)*. *BMC infectious*  
482 *diseases*, 2020. **20**(1): p. 1-8.
- 483 52. Dudley, D.M., et al., *Optimizing direct RT-LAMP to detect transmissible SARS-CoV-2 from primary*  
484 *nasopharyngeal swab samples*. *PLoS One*, 2020. **15**(12): p. e0244882.
- 485 53. Baek, Y.H., et al., *Development of a reverse transcription-loop-mediated isothermal amplification*  
486 *as a rapid early-detection method for novel SARS-CoV-2*. *Emerging microbes & infections*, 2020.  
487 **9**(1): p. 998-1007.
- 488 54. Haque, M.F.U., et al., *A novel RdRp-based colorimetric RT-LAMP assay for rapid and sensitive*  
489 *detection of SARS-CoV-2 in clinical and sewage samples from Pakistan*. *Virus research*, 2021: p.  
490 198484.
- 491 55. Bivins, A., et al., *Building-Level Wastewater Monitoring for COVID-19 Using Tampon Swabs and*  
492 *RT-LAMP for Rapid SARS-Cov-2 RNA Detection*. 2021.
- 493 56. Jiang, M., et al., *Development and validation of a rapid, single-step reverse transcriptase loop-*  
494 *mediated isothermal amplification (RT-LAMP) system potentially to be used for reliable and high-*  
495 *throughput screening of COVID-19*. *Frontiers in cellular and infection microbiology*, 2020. **10**: p.  
496 331.
- 497 57. Forcelloni, S., et al., *Identification of conserved epitopes in SARS-CoV-2 spike and nucleocapsid*  
498 *protein*. *BioRxiv*, 2020.
- 499 58. Zhang, X., et al., *The N gene of SARS-CoV-2 was the main positive component in repositive*  
500 *samples from a cohort of COVID-19 patients in Wuhan, China*. *Clinica Chimica Acta*, 2020. **511**: p.  
501 291-297.
- 502 59. Loying, P., et al., *Dynamics of ORF1ab and N Gene among hospitalized COVID-19 positive*  
503 *cohorts: A hospital based retrospective study*. *medRxiv*, 2020.
- 504 60. Wei, S., et al., *Direct diagnostic testing of SARS-CoV-2 without the need for prior RNA extraction*.  
505 *Scientific reports*, 2021. **11**(1): p. 1-6.
- 506 61. Ongerth, J.E. and R.E. Danielson, *RT qLAMP--Direct Detection of SARS-CoV-2 in Raw Sewage*.  
507 *medRxiv*, 2020.
- 508 62. Garcia-Venzor, A., et al., *SARS-CoV-2 Direct Detection Without RNA Isolation With Loop-*  
509 *Mediated Isothermal Amplification (LAMP) and CRISPR-Cas12*. *Frontiers in Medicine*, 2021. **8**: p.  
510 125.



- 511 63. Lalli, M.A., et al., *Rapid and extraction-free detection of SARS-CoV-2 from saliva by colorimetric*  
512 *reverse-transcription loop-mediated isothermal amplification*. *Clinical chemistry*, 2021. **67**(2): p.  
513 415-424.
- 514 64. Mauk, M.G., et al., *Microfluidic devices for nucleic acid (NA) isolation, isothermal NA*  
515 *amplification, and real-time detection*, in *Mobile Health Technologies*. 2015, Springer. p. 15-40.
- 516
